# Supplementary material
Source: publisher figshare collection journal article supplement (https://acs.figshare.com/ndownloader/files/4003483)
Supplement: Supplementary file 1 [file 4003483]

**Effect of Al<sup>3+</sup> Co-Doping on the Dopant Local Structure, Optical Properties, and Exciton  
Dynamics in Cu<sup>+</sup>-Doped ZnSe Nanocrystals**

*Sheraz Gul<sup>†,‡</sup>, Jason Kyle Cooper<sup>†</sup>, Jinghua Guo<sup>§</sup>, Vittal K. Yachandra<sup>‡</sup>, Junko Yano<sup>‡\*</sup> and Jin*

*Zhong Zhang<sup>†\*</sup>*

*<sup>†</sup>Department of Chemistry and Biochemistry, University of California, Santa Cruz, CA 95064,*

*USA*

*<sup>‡</sup>Physical Biosciences Division, Lawrence Berkeley National Laboratory, Berkeley, CA 94720,*

*USA*

*<sup>§</sup>Advanced Light Source, Lawrence Berkeley National Laboratory, Berkeley, CA 94720, USA*

\*Corresponding authors: [jyano@lbl.gov](mailto:jyano@lbl.gov) and [zhang@ucsc.edu](mailto:zhang@ucsc.edu)

**Table S1.** Local structure parameters for Zn and Cu in nanocrystal samples determined after fitting the Fourier transformed data. ZnSe bulk parameters are also shown. Debye-Waller factor ( $\sigma^2$ ) was used as a variable parameter whereas  $S_0^2$  value was fixed to 0.81 for Zn and 0.83 for Cu data.

| Sample     | Fit # | Path   | R ( Å)    | N       | $\sigma^2$ ( Å <sup>2</sup> ) | $\Delta E_0$ (eV) | R-factor | $\chi^2_{red}$ |
|------------|-------|--------|-----------|---------|-------------------------------|-------------------|----------|----------------|
| ZnSe bulk  |       | Zn-Se  | 2.45      | 4       | 0.003                         | -3.16±2.0         | 0.002    |                |
|            |       | Zn-Zn  | 4.01      | 12      | 0.005                         |                   |          |                |
|            |       | Zn-Se  | 4.70      | 12      | 0.006                         |                   |          |                |
| ZnSe NCs   |       | Zn-Se  | 2.45±0.01 | 4.0     | 0.004                         | 3.56±2.0          | 0.007    |                |
|            |       | Zn-Zn  | 4.01±0.01 | 9.1±0.4 | 0.006                         |                   |          |                |
|            |       | Zn-Se  | 4.69±0.01 | 7.6±0.4 | 0.008                         |                   |          |                |
| ZnSe:Cu    | 1     | Cu-Se  | 2.33±0.02 | 2.8±0.3 | 0.012                         | -13.68±4.0        | 0.025    | 289            |
|            | 2     | Cu-Se  | 2.35±0.01 | 2.6±0.3 | 0.005                         | -4.67±2.0         | 0.005    | 47             |
|            |       | Cu-O   | 1.98±0.02 | 0.9±0.3 | 0.003                         |                   |          |                |
|            | 3     | Cu-Se  | 2.34±0.01 | 2.7±0.3 | 0.006                         | -5.06±2.0         | 0.006    | 61             |
|            |       | Cu-O   | 1.97±0.02 | 0.9±0.3 | 0.007                         |                   |          |                |
|            |       | Cu-Zn1 | 3.63±0.02 | 2.0±0.3 | 0.011                         |                   |          |                |
|            |       | Cu-Zn2 | 4.00±0.02 | 4.0±0.3 | 0.013                         |                   |          |                |
|            |       | Cu-Zn3 | 4.38±0.02 | 2.0±0.3 | 0.012                         |                   |          |                |
|            |       |        |           |         |                               |                   |          |                |
| ZnSe:Cu,Al | 1     | Cu-Se  | 2.35±0.02 | 3.6±0.3 | 0.019                         | -8.34±3.0         | 0.091    | 190            |
|            | 2     | Cu-Se  | 2.35±0.02 | 2.8±0.3 | 0.006                         | -2.42±1.0         | 0.002    | 99             |
|            |       | Cu-Se  | 2.67±0.02 | 0.9±0.3 | 0.008                         |                   |          |                |

|  |   |        |           |         |       |           |       |    |
|--|---|--------|-----------|---------|-------|-----------|-------|----|
|  | 3 | Cu-Se  | 2.35±0.02 | 2.8±0.3 | 0.006 | -3.92±2.0 | 0.002 | 52 |
|  |   | Cu-Se  | 2.67±0.02 | 0.9±0.3 | 0.008 |           |       |    |
|  |   | Cu-Zn1 | 3.62±0.02 | 2.2±0.3 | 0.009 |           |       |    |
|  |   | Cu-Zn2 | 4.02±0.02 | 4.5±0.3 | 0.013 |           |       |    |
|  |   | Cu-Zn3 | 4.39±0.02 | 2.2±0.3 | 0.014 |           |       |    |

For Zn EXAFS, a fit region of  $1.1 \leq R (\text{\AA}) \leq 4.7$  was used. In the case of Cu EXAFS for ZnSe:Cu and ZnSe:Cu,Al, fit # 1 and 2 were carried over the r-range  $1.3 \leq R (\text{\AA}) \leq 2.7$  for each sample, whereas data were fit in the range  $1.1 \leq R (\text{\AA}) \leq 4.4$  for fit # 3 in both the samples. Regarding  $k$ -space, a range of  $3.5 \leq k (\text{\AA}^{-1}) \leq 14$  was used for Zn EXAFS, whereas a  $k$ -space window of  $3.5 \leq k (\text{\AA}^{-1}) \leq 11$  was used for Cu EXAFS data.

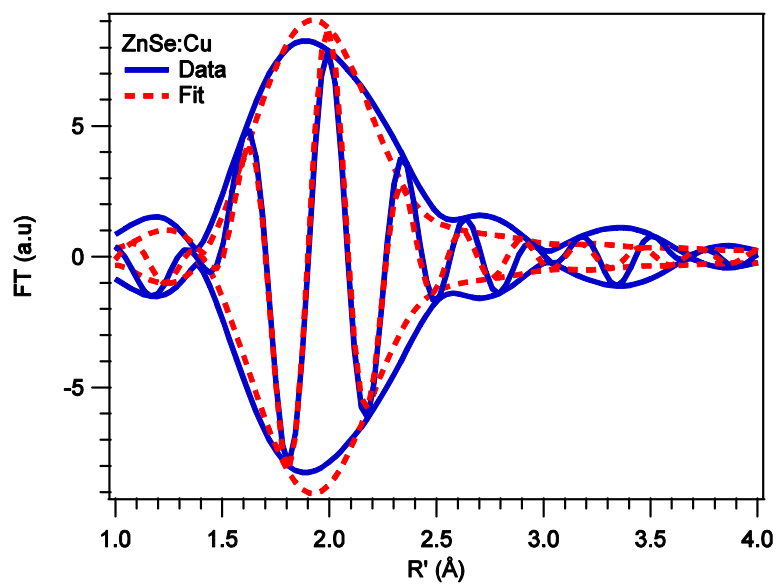

**Figure S1.** Cu EXAFS data (blue) for ZnSe:Cu along with the fit # 1 (red) without taking into account the surface Cu site but allowing Cu-Se distance to vary.

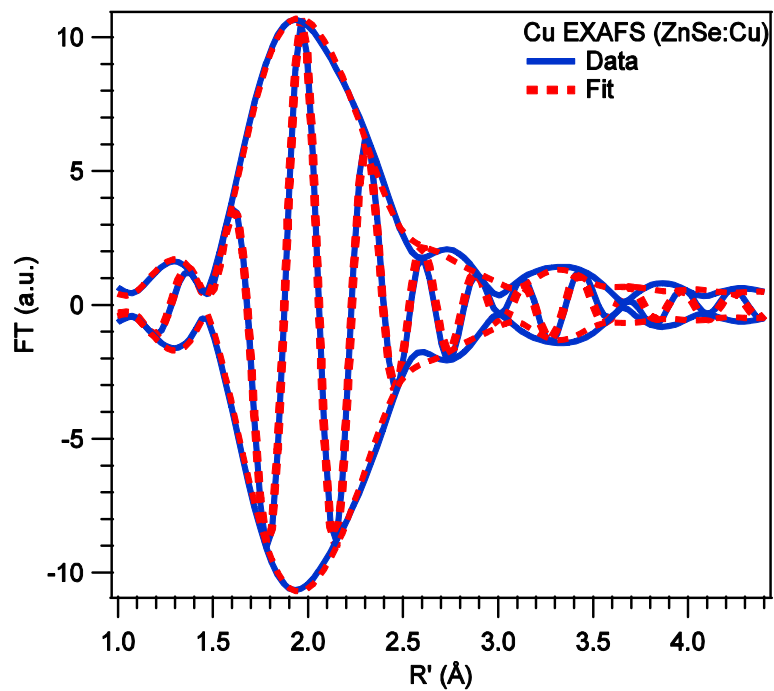

**Figure S2.** Cu EXAFS data (blue) for ZnSe:Cu along with the fit # 3 (red) carried over a range of 1.1 to 4.4 Å.

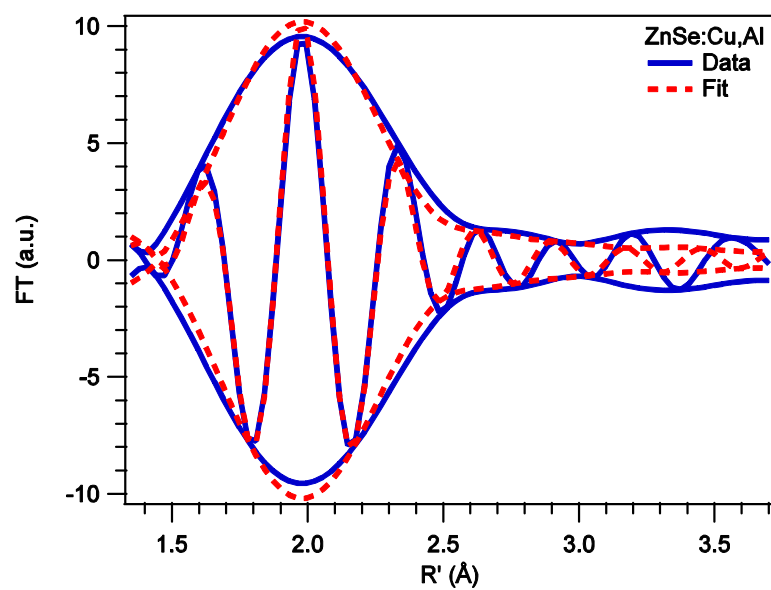

**Figure S3.** EXAFS data (blue) at Cu  $K$ -edge for ZnSe:Cu,Al including the fit # 1 (red) when allowing the Cu-Se distance to vary.

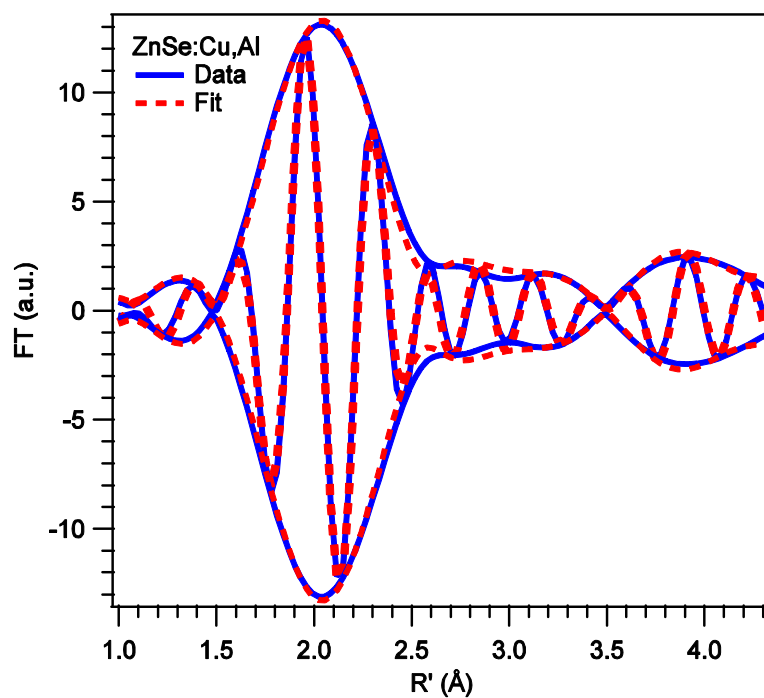

**Figure S4.** EXAFS data (blue) at Cu *K*-edge for ZnSe:Cu,Al including the fit # 3 (red) carried over the range 1.1 to 4.4 Å.

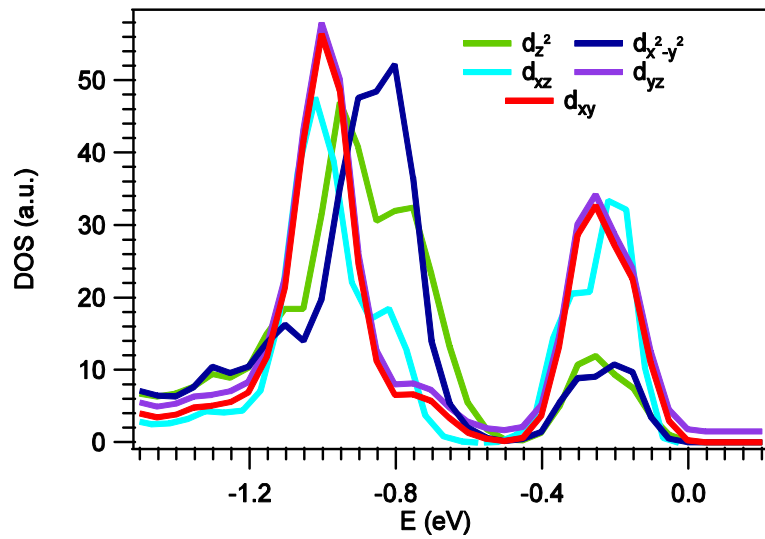

**Figure S5.** *d* orbital DOS for Cu in ZnSe:Cu 64 atom unit cell in a distorted tetrahedral site adjacent to a Se vacancy.



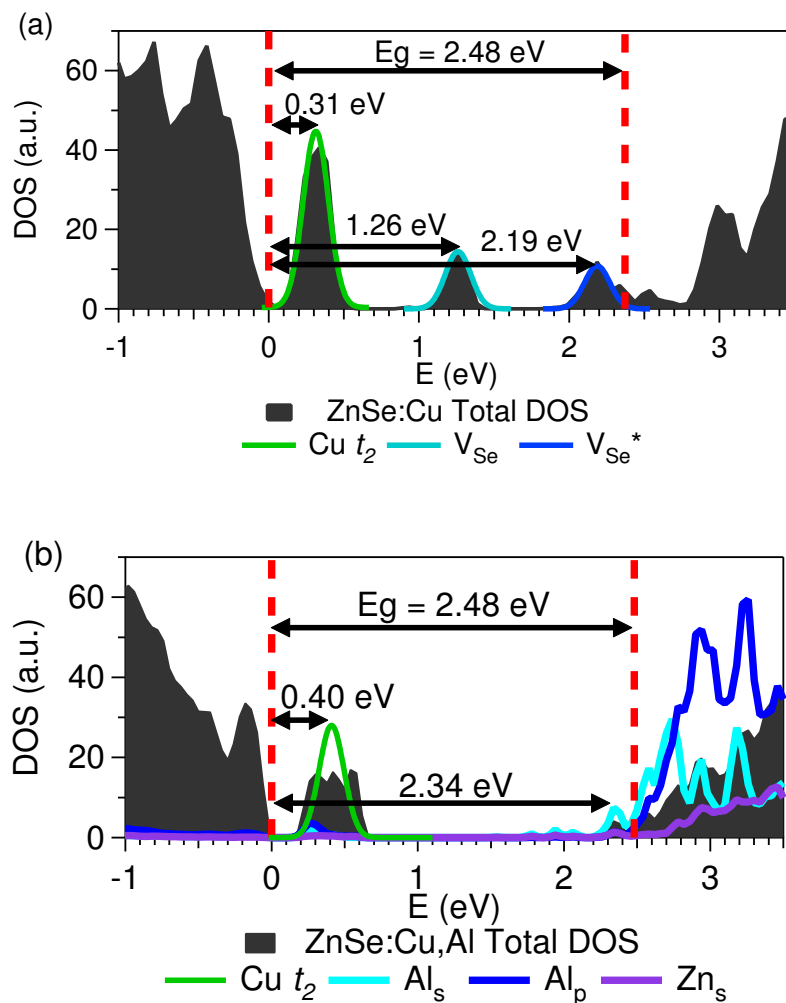

**Figure S6.** (a) DOS of ZnSe:Cu showing VB and CB edge (red), along with the Gaussian fits for  $\text{Cu } t_2$  (green),  $V_{\text{Se}}$  (light blue), and  $V_{\text{Se}}^*$  (dark blue). (b) DOS for ZnSe:Cu,Al including the Al  $sp^3$  (light and dark blue), Zn(s), and the Gaussian fit for  $\text{Cu } t_2$  (green),
